# Supplementary material for: Term-BLAST-like alignment tool for concept recognition in noisy clinical texts
Source: PubMed Central journal article supplement (PMC10710372; doi:10.1093/bioinformatics/btad716), 2023-11-24

# Term-BLAST-Like Alignment Tool for Concept Recognition in Noisy Clinical Texts

- Supplementary material -

## 1. List of stop words removed by the TBLAT algorithm

- a, the, and, of, in, to, on, an, with

## 2. Coverage of the typographical errors associated with the ontological tokens in the gold standard given the underlying score distribution and group according to the length of the token.

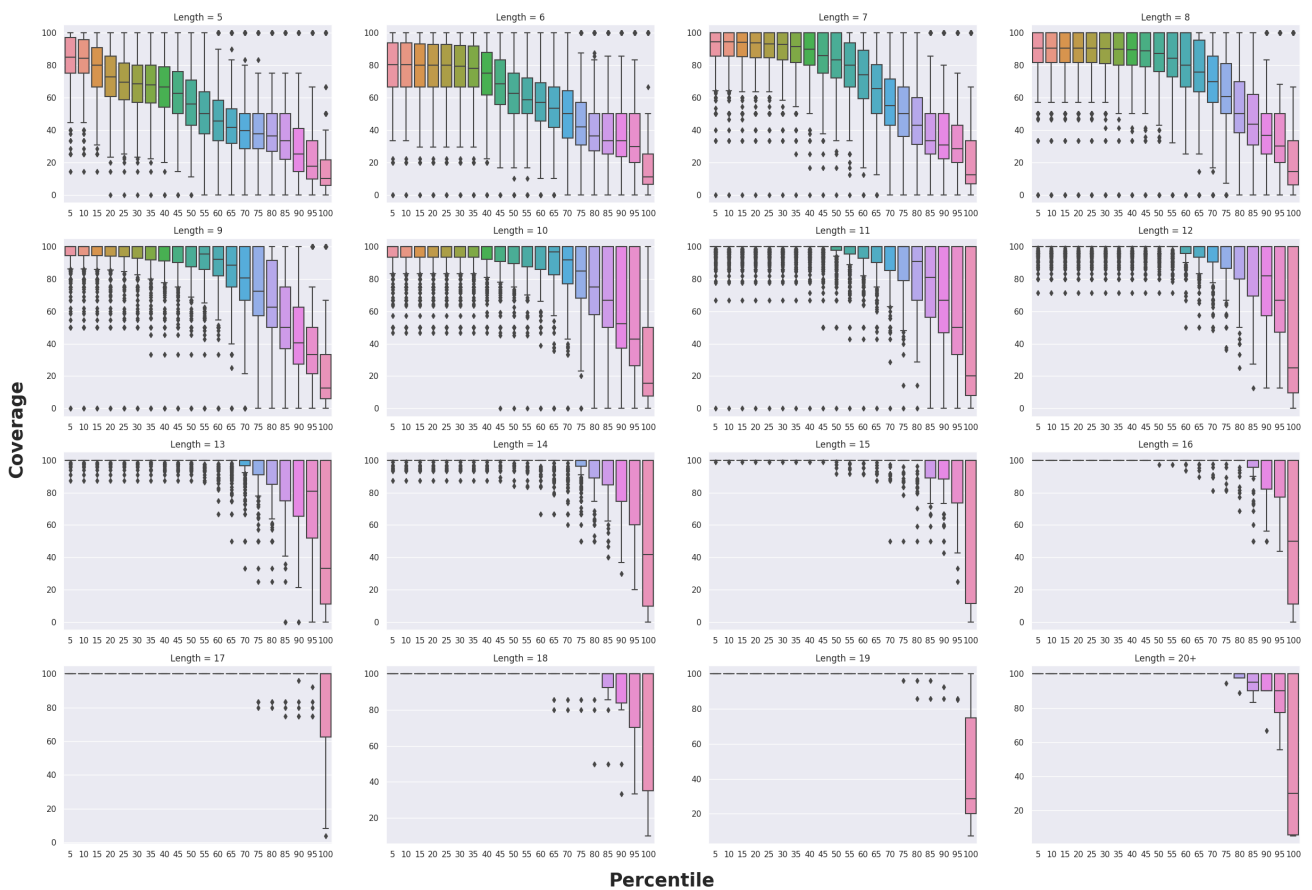

Supplement: btad716_supplementary_data.pdf [file btad716_supplementary_data.pdf]
